# Supplementary material
Source: PubMed Central journal article supplement (PMC9937976)
Supplement: mmc1.pdf [file mmc1.pdf]

## Appendix 1: Kumul Helt Skul courses

| Course name                           | Indicative screenshot                                                                                                                                                                                                                                                                                                                                                                                 |
|---------------------------------------|-------------------------------------------------------------------------------------------------------------------------------------------------------------------------------------------------------------------------------------------------------------------------------------------------------------------------------------------------------------------------------------------------------|
| <p>Welcome</p>                        |  <p><b>Welcome</b></p> <p>It's great to have you participating in this training program. This first course will show you how to use Kumul Helt Skul. At the end, you will be directed to complete a pre-learning questionnaire. This is to measure your baseline knowledge and doesn't require any preparation.</p> |
| <p>Introduction to emergency care</p> |  <p><b>Ingredients for a well functioning ED</b></p> <p>The above components, referred to as the 4 S's, are essential to a well functioning ED.</p>                                                                                                                                                                |
| <p>Triage</p>                         | <p><b>ED Course 3 - Triage</b></p> <p>Using the Interagency Integrated Triage Tool (IITT) to prioritise patients</p> <p>LESSONS      DISCUSSION</p> <p>Lesson 1 - The Interagency Integrated Triage...</p> <p>Lesson 2 - Triage assessment</p> <p>Lesson 3 - Vital signs</p> <p>Lesson 4 - Special applications</p>                                                                                   |

## Patient flow

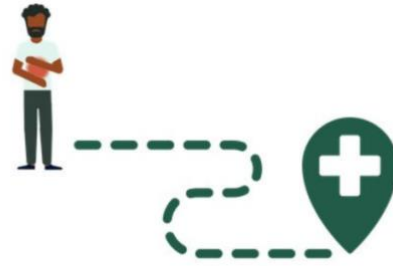

### What is patient flow?

Patient flow is the movement of patients through a healthcare facility. Ideally it is as efficient as possible, with minimal delays.

## Triage and flow in practice

**A patient reports being bitten by a snake approximately 15 minutes ago. He has localised pain but is not in any distress. Which triage category should he be allocated?**

Category 3, because he has normal vital signs

Category 1, because he meets red criteria

Category 2, because he meets yellow criteria

No triage decision is required because the patient is not distressed

Check answer

## Clinical documentation and data management

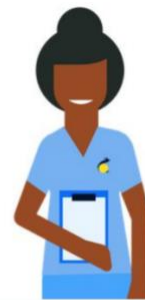

To ensure accurate clinical documentation:

- Complete a PRTF for every patient
- Ensure the details are correct
- Fill in exact times (use 24 hour time or AM/PM)
- Write clearly
- Fill in all sections

This ensures that information is available for both clinical and administrative purposes.

|                                                   |                                                                                                                                                                                                                                                                                                                                                                                           |
|---------------------------------------------------|-------------------------------------------------------------------------------------------------------------------------------------------------------------------------------------------------------------------------------------------------------------------------------------------------------------------------------------------------------------------------------------------|
| <p>Essential emergency skills</p>                 |  <p><b>Primary survey algorithm</b></p>                                                                                                                                                                                                                                                                 |
| <p>Equipment</p>                                  |  <p><b>Pad/paddle placement</b><br/>Anterior-lateral position</p> <p>This anterior-lateral position is the most practical in the ED. Pad 1 is applied to the right parasternal area over the 2nd intercostal space. Pad 2 is applied to the left midaxillary line over the 6th intercostal space.</p> |
| <p>Infection prevention and control in the ED</p> |  <p>There are 3 modes of transmission that cause diseases to spread:</p> <ul style="list-style-type: none"> <li>• Contact transmission</li> <li>• Droplet transmission</li> <li>• Airborne transmission</li> </ul> <p>The next few cards discuss these transmission modes in relation to the ED.</p>  |

## Summary

**1** Check for red criteria

**2** Check for yellow criteria

**3** Check for high risk vital signs

### Follow the triage assessment pathway

Remember to use all of the available resources. You do not need to memorise everything.
