# Supplementary material
Source: PubMed Central journal article supplement (PMC9937976)
Supplement: mmc4.pdf [file mmc4.pdf]

#### Appendix 4: Images demonstrating clinical redesign

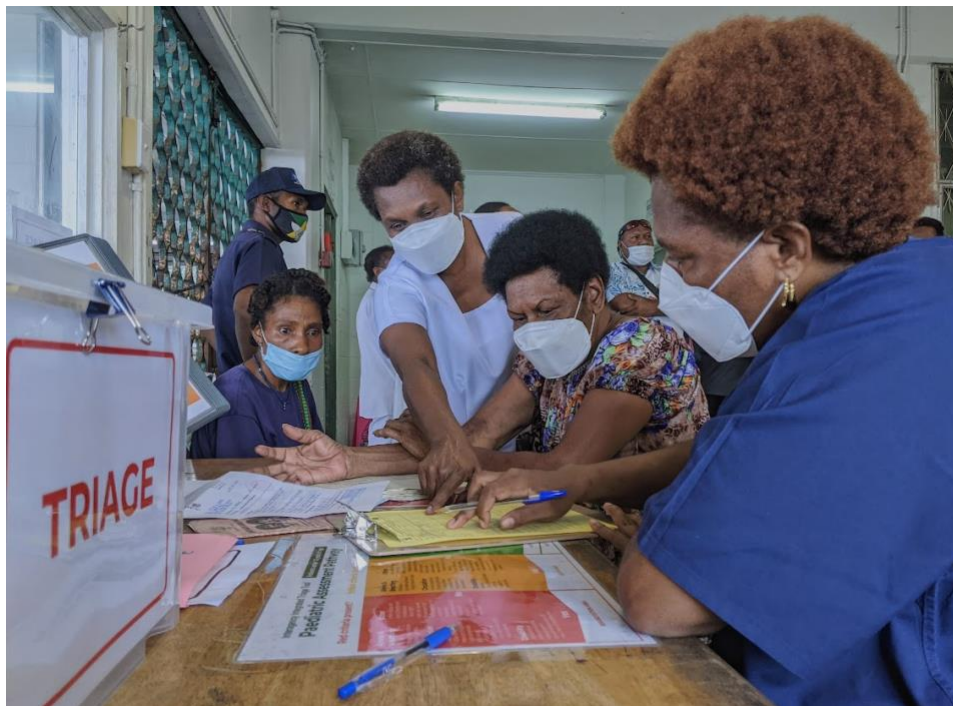

Wilma Sebby educating ED nurses and clerks at the new triage desk and window

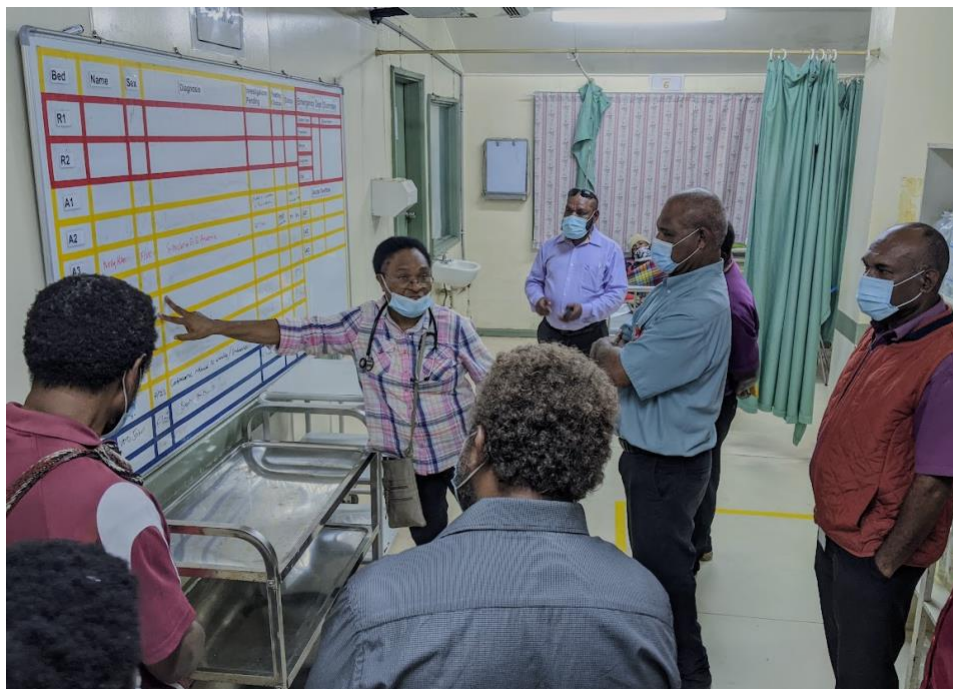

Donna Piamnok explains the patient allocation and tracking board to local staff

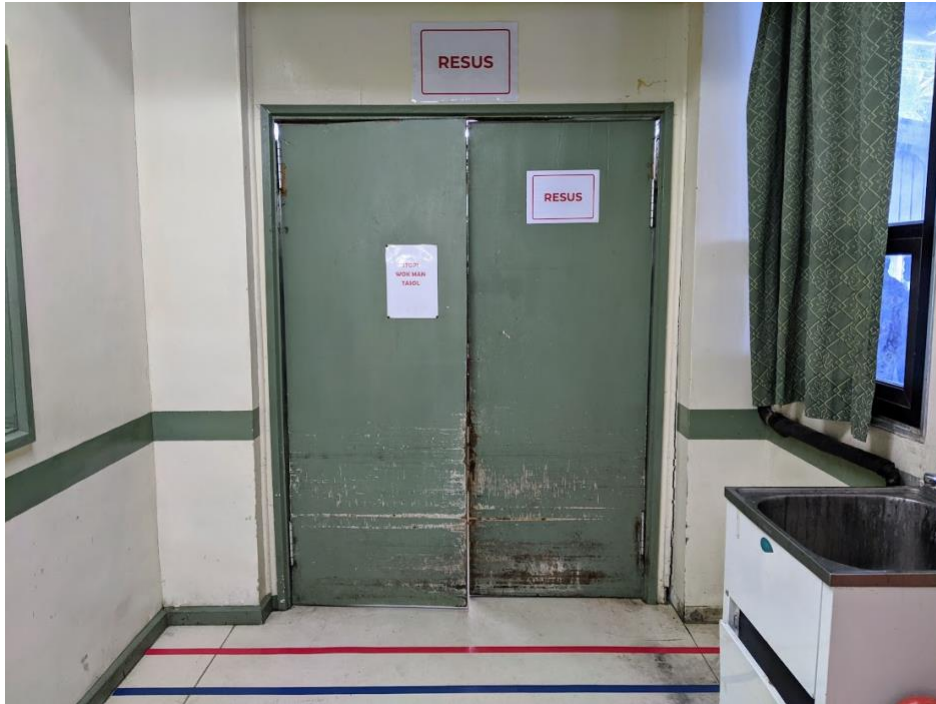

Red tape delineates the resuscitation area

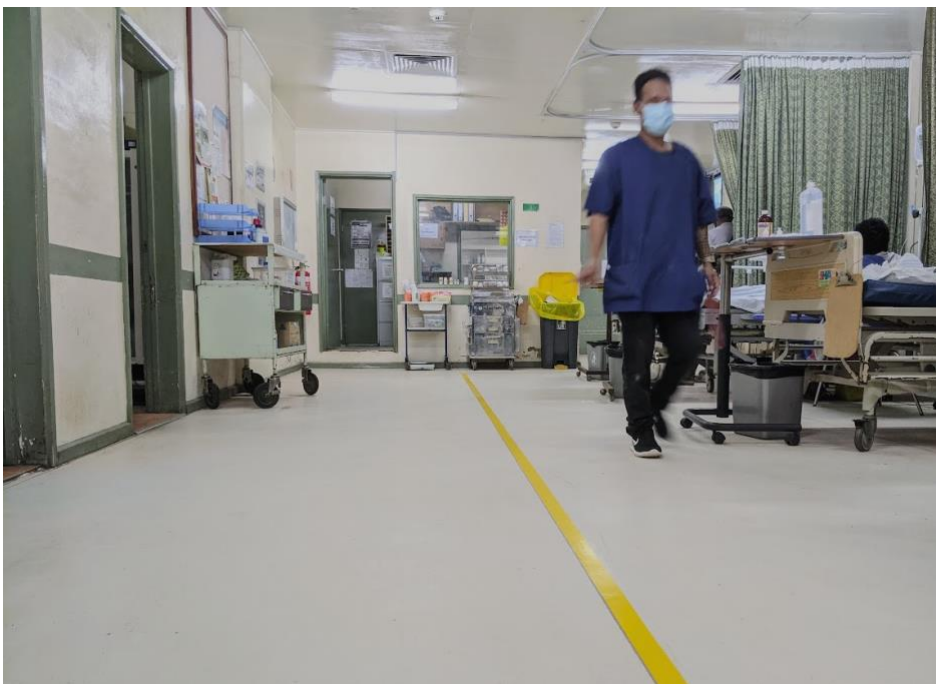

Yellow tape delineates the acute area

**STAFF ALLOCATIONS**

| LOCATION<br>ROLE | EARLY SHIFT   |        | LATE SHIFT |        | NIGHT SHIFT |        | ROLE          | EARLY SHIFT | LATE SHIFT | NIGHT SHIFT |
|------------------|---------------|--------|------------|--------|-------------|--------|---------------|-------------|------------|-------------|
|                  | NO/CHW        | MO/HEO | NO/CHW     | MO/HEO | NO/CHW      | MO/HEO |               |             |            |             |
| TEAM LEADER      | Sr. secretary |        |            |        |             |        | Admin         |             |            |             |
| TRIAGE           |               |        |            |        |             |        | Hygiene       |             |            |             |
| RESUS            |               |        |            |        |             |        | Security      |             |            |             |
| ACUTE            |               |        |            |        |             |        | ANNOUNCEMENTS |             |            |             |
| ACUTE            |               |        |            |        |             |        |               |             |            |             |
| ACUTE OVERFLOW   |               |        |            |        |             |        |               |             |            |             |
| FAST TRACK       |               |        |            |        |             |        |               |             |            |             |
| MINOR O.T.       |               |        |            |        |             |        |               |             |            |             |
| TASK ALLOCATION  |               |        |            |        |             |        |               |             |            |             |

Staffing allocations are linked to streams of care

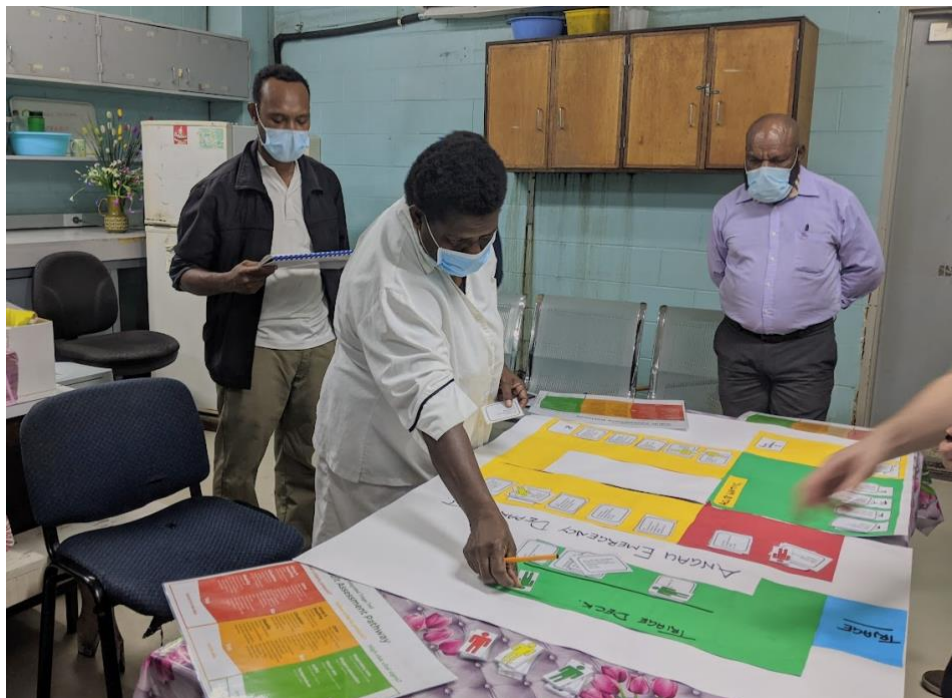

Clinicians at AMH practise allocating patients and staff to care streams

Photo credit: Jean-Philippe Miller
