# Supplementary material
Source: PubMed Central journal article supplement (PMC9937976)
Supplement: mmc6.pdf [file mmc6.pdf]

## Introduction

### **Evaluation: Essential Emergency Care Systems Training Program**

The purpose of this survey is to collect feedback on your recent training, as well as the new triage and flow system.

The survey will take approximately 3 minutes to complete. Your feedback is anonymous and will help improve future training programs in Papua New Guinea.

## Research

If you consent, data collected through this survey will also contribute to research regarding the effectiveness of online learning through Kumul Helt Skul. Only grouped (de-identified) data will be published. For further information, click [here](#).

By answering yes to the relevant consent question in the survey, you acknowledge that you have read and understood the [explanatory statement](#) and agree to voluntarily participate in this research.

## Demographics

## Demographics

I provide consent for my survey responses to contribute to research that evaluates the training program

- Yes
- No

Where do you work?

- ANGAU Memorial Hospital - Emergency Department
- ANGAU Memorial Hospital - other department
- Port Moresby General Hospital - Emergency Department
- Port Moresby General Hospital - other department
- Other health facility in Morobe Province
- Other health facility in National Capital District

Other

What is your gender?

Male

Female

Other/Prefer not to say

What is your age?

Which of the following best describes your role?

Medical officer

Health extension officer

Nurse

Community health worker

Administration officer/Ward clerk

Security officer

Other

## Triage and flow system

## Triage and flow system

The triage assessment process is easy to follow

- Strongly agree
- Agree
- Disagree
- Strongly disagree

The new triage and flow system helps identify and prioritise the most urgent patients

- Strongly agree
- Agree
- Disagree
- Strongly disagree

The triage and flow system has improved patient flow in the ED

- Strongly agree
- Agree
- Disagree
- Strongly disagree

Implementation of the triage and flow system has improved my job satisfaction

- Strongly agree
- Agree
- Disagree
- Strongly disagree

Implementation of the triage and flow system has improved patient and staff safety in the ED

- Strongly agree
- Agree
- Disagree
- Strongly disagree

How do you think the triage and flow system could be improved?

## Training process – Kumul Helt Skul

## Training process – Kumul Helt Skul

Did you complete the entirety of the Essential Emergency Care Systems Training Program on Kumul Helt Skul, including the Course 10 exam?

Yes

No

Did you participate in any of the Essential Emergency Care Systems Training Program courses on Kumul Helt Skul?

Yes

No

The learning platform (Kumul Helt Skul) was easy to access

Strongly agree

Agree

Disagree

Strongly disagree

The learning platform (Kumul Helt Skul) was easy to use and navigate

Strongly agree

Agree

Disagree

Strongly disagree

The digital teaching methods were appropriate for my learning needs

Strongly agree

Agree

Disagree

Strongly disagree

The learning content was interesting and engaging

Strongly agree

Agree

Disagree

Strongly disagree

The learning content made it easy for me to understand the new triage and flow processes

- Strongly agree
- Agree
- Disagree
- Strongly disagree

The duration of the training program was sufficient to meet the learning objectives

- Strongly agree
- Agree
- Disagree
- Strongly disagree

The learning platform (Kumul Helt Skul) provided sufficient opportunities for discussion with my colleagues

- Strongly agree
- Agree
- Disagree
- Strongly disagree



The learning platform (Kumul Helt Skul) provided sufficient opportunities for me to ask questions about the new system

- Strongly agree
- Agree
- Disagree
- Strongly disagree

The digital training program adequately supported implementation of the triage and flow system

- Strongly agree
- Agree
- Disagree
- Strongly disagree

The reference materials (e.g. triage flowcharts and diagrams in the quick reference guide) helped me to understand the new system

- Strongly agree
- Agree
- Disagree
- Strongly disagree

How could the learning platform (Kumul Helt Skul) be improved?

What were the most significant barriers to you engaging with the learning platform (Kumul Helt Skul)?

## **Training process - live sessions**

## **Training process - live sessions**

Did you participate in any of the live training sessions linked with the Essential Emergency Care Systems Training Program?

- Yes
- No

The live sessions were a useful addition to the digital learning content on Kumul Helt Skul

- Strongly agree
- Agree
- Disagree
- Strongly disagree

The teaching methods were appropriate for my learning needs

- Strongly agree
- Agree
- Disagree
- Strongly disagree

The duration of the live sessions was appropriate

- Strongly agree
- Agree
- Disagree
- Strongly disagree

There were sufficient opportunities during the live sessions to ask questions about the learning content

- Strongly agree
- Agree
- Disagree
- Strongly disagree

The clinical mentoring and peer support from Australian emergency nurses was a useful addition to the online training and live sessions

- Strongly agree
- Agree
- Disagree
- Strongly disagree

How could the live sessions be improved?

What were the most significant barriers to you engaging with the live sessions?

## Other

### Other feedback

Would you like to make any other comments about the new triage and flow system or the training process?

Powered by Qualtrics
