# Supplementary material
Source: PubMed Central journal article supplement (PMC9937976)
Supplement: mmc7.pdf [file mmc7.pdf]

## Appendix 7: Kumul Helt Skul engagement data

|                                                        |            | n (%)       |
|--------------------------------------------------------|------------|-------------|
| <b>Total Kumul Helt Skul users in Papua New Guinea</b> |            | 401 (100%)  |
| <b>Device</b>                                          | Smartphone | 332 (82.8%) |
|                                                        | Tablet     | 55 (13.7%)  |
|                                                        | Desktop    | 14 (3.5%)   |
| <b>Operating system</b>                                | Android    | 304 (75.8%) |
|                                                        | Windows    | 42 (10.5%)  |
|                                                        | iOS        | 42 (10.5%)  |
|                                                        | Macintosh  | 10 (2.5%)   |
|                                                        | Linux      | 3 (0.7%)    |

*Participant numbers include all KHS users in PNG, not just ED clinicians. Each user, on average, had 6.4 engagements with the platform, each lasting an average of 1 hours and 48 minutes. Data supplied by Catalpa, approximately six months after the launch of KHS.*
