# Supplementary material
Source: PubMed Central journal article supplement (PMC9937976)
Supplement: mmc8.pdf [file mmc8.pdf]

## Appendix 8: Confidence (tabulated)

| I feel confident to...                                                      | PRE-TRAINING SURVEY (PART B) |      |          |       |       |       |                |       | POST TRAINING SURVEY (PART B) |      |          |       |       |       |                |       | Chi <sup>2</sup> | p-value |
|-----------------------------------------------------------------------------|------------------------------|------|----------|-------|-------|-------|----------------|-------|-------------------------------|------|----------|-------|-------|-------|----------------|-------|------------------|---------|
|                                                                             | Strongly disagree            |      | Disagree |       | Agree |       | Strongly agree |       | Strongly disagree             |      | Disagree |       | Agree |       | Strongly agree |       |                  |         |
|                                                                             | n                            | %    | n        | %     | n     | %     | n              | %     | n                             | %    | n        | %     | n     | %     | n              | %     |                  |         |
| Undertake a triage assessment                                               | 0                            | 0.0% | 0        | 0.0%  | 44    | 48.4% | 47             | 51.6% | 1                             | 1.1% | 0        | 0.0%  | 25    | 27.5% | 65             | 71.4% | 12.5             | 0.0004  |
| Determine which patients should be prioritised for assessment and treatment | 0                            | 0.0% | 1        | 1.1%  | 44    | 48.4% | 46             | 50.5% | 1                             | 1.1% | 0        | 0.0%  | 24    | 26.4% | 66             | 72.5% | 14.3             | 0.0002  |
| Manage a busy waiting room                                                  | 0                            | 0.0% | 3        | 3.3%  | 41    | 45.1% | 47             | 51.6% | 1                             | 1.1% | 0        | 0.0%  | 29    | 31.9% | 61             | 67.0% | 8.2              | 0.0066* |
| Identify an unwell patient                                                  | 0                            | 0.0% | 0        | 0.0%  | 42    | 46.2% | 49             | 53.8% | 1                             | 1.1% | 0        | 0.0%  | 20    | 22.0% | 70             | 76.9% | 14.2             | 0.0002  |
| Determine which patients should be allocated a bed in ED                    | 1                            | 1.1% | 1        | 1.1%  | 43    | 47.3% | 45             | 49.5% | 1                             | 1.1% | 1        | 1.1%  | 23    | 25.3% | 66             | 72.5% | 15.2             | 0.0001  |
| Accurately document an ED presentation                                      | 1                            | 1.1% | 1        | 1.1%  | 50    | 54.9% | 39             | 42.9% | 1                             | 1.1% | 0        | 0.0%  | 21    | 23.1% | 69             | 75.8% | 22.5             | <0.0001 |
| Perform a secondary survey                                                  | 0                            | 0.0% | 2        | 2.2%  | 47    | 51.6% | 42             | 46.2% | 1                             | 1.1% | 1        | 1.1%  | 28    | 30.8% | 61             | 67.0% | 10.9             | 0.0009  |
| Perform an ECG                                                              | 0                            | 0.0% | 1        | 1.1%  | 34    | 37.4% | 56             | 61.5% | 1                             | 1.1% | 0        | 0.0%  | 21    | 23.1% | 69             | 75.8% | 7.4              | 0.011*  |
| Administer oxygen                                                           | 0                            | 0.0% | 1        | 1.1%  | 27    | 29.7% | 63             | 69.2% | 1                             | 1.1% | 0        | 0.0%  | 16    | 17.6% | 74             | 81.3% | 5.8              | 0.027*  |
| Maintain effective IPC in the ED                                            | 0                            | 0.0% | 3        | 3.3%  | 46    | 50.5% | 42             | 46.2% | 1                             | 1.1% | 0        | 0.0%  | 33    | 36.3% | 57             | 62.6% | 9.8              | 0.0026* |
| Categorise a patient's conscious state                                      | 0                            | 0.0% | 1        | 1.1%  | 38    | 41.8% | 52             | 57.1% | 1                             | 1.1% | 0        | 0.0%  | 25    | 27.5% | 65             | 71.4% | 5.8              | 0.016   |
| Perform a primary survey                                                    | 0                            | 0.0% | 0        | 0.0%  | 39    | 42.9% | 52             | 57.1% | 1                             | 1.1% | 0        | 0.0%  | 22    | 24.2% | 68             | 74.7% | 8.5              | 0.0035  |
| Handover a patient to another clinician                                     | 0                            | 0.0% | 0        | 0.0%  | 36    | 39.6% | 55             | 60.4% | 1                             | 1.1% | 0        | 0.0%  | 20    | 22.0% | 70             | 76.9% | 8.3              | 0.0039  |
| Perform defibrillation                                                      | 1                            | 1.1% | 23       | 25.3% | 43    | 47.3% | 24             | 26.4% | 2                             | 2.2% | 11       | 12.1% | 45    | 49.5% | 33             | 36.3% | 3.0              | 0.083   |
| Use nitrous oxide in the ED                                                 | 4                            | 4.4% | 40       | 44.0% | 33    | 36.3% | 14             | 15.4% | 5                             | 5.5% | 17       | 18.7% | 47    | 51.6% | 22             | 24.2% | 3.2              | 0.12*   |

*p-value calculated using McNemar's test for categorical variables, by comparing the percentage of participants who strongly agreed they were confident to perform the listed tasks before and after completion of the training program. For variables with low frequencies (indicated with an asterisk [\*]), the exact version of McNemar's test was applied.*
